# Supplementary material for: Accuracy of Genomic Prediction in Switchgrass (Panicum virgatum L.) Improved by Accounting for Linkage Disequilibrium
Source: PubMed Central journal article supplement (PMC4825640; doi:10.1534/g3.115.024950), 2016-02-10
Supplement: supp_g3.115.024950_FigureS4.pdf [file supp_g3.115.024950_FigureS4.pdf]

WS4U-C2: DMY in WI

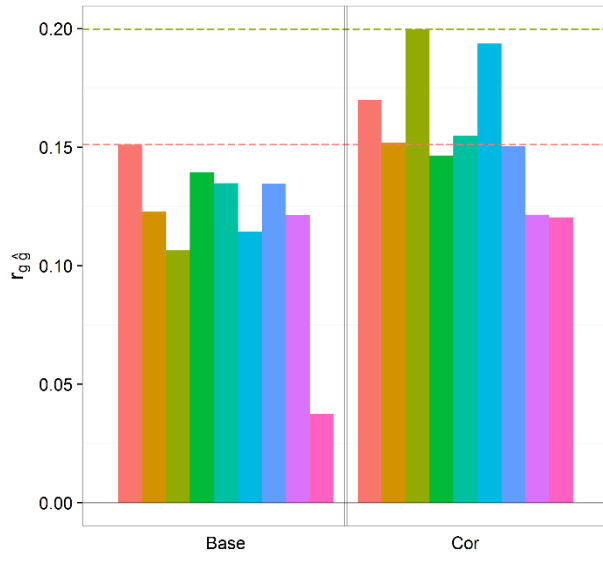

Liberty-C2: DMY in WI

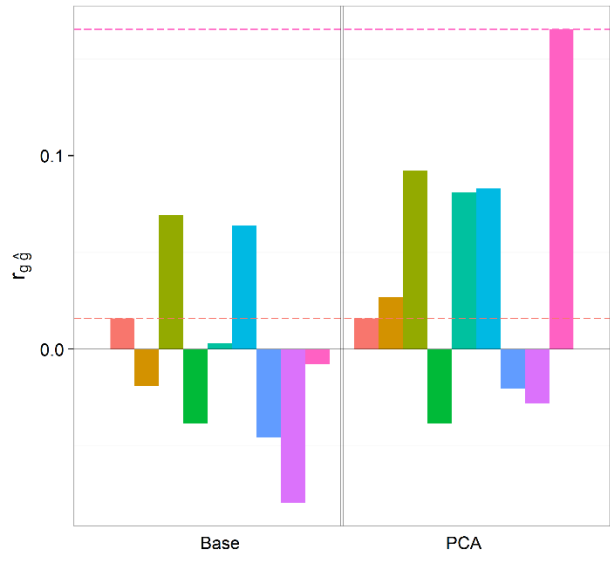

WS4U-C2: DMY in NE

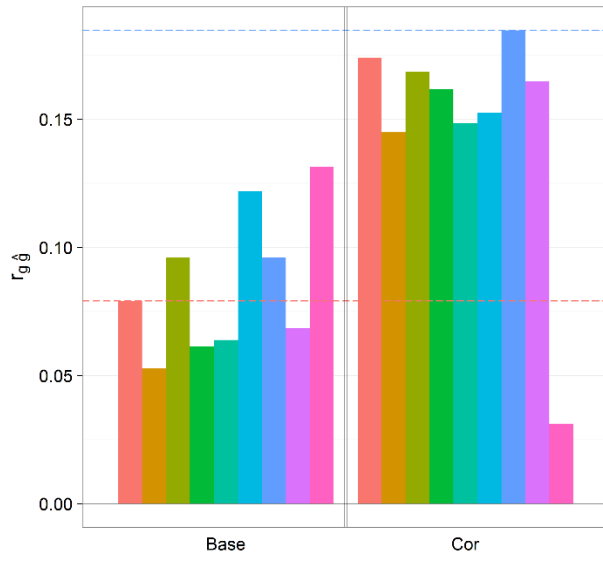

Liberty-C2: DMY in NE

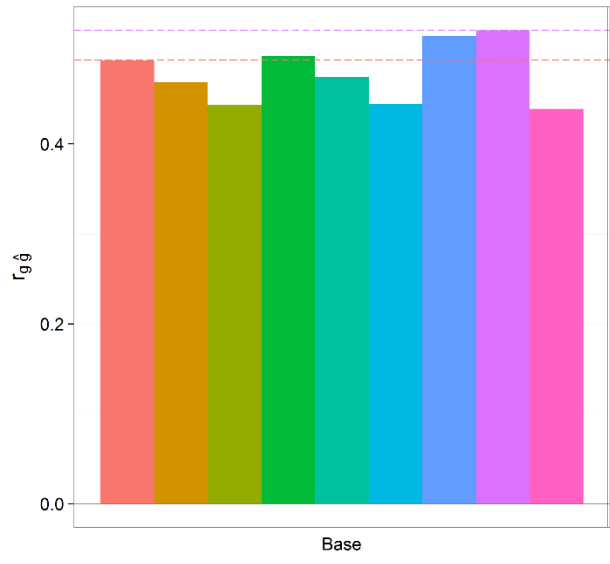

WS4U-C2: PH in WI

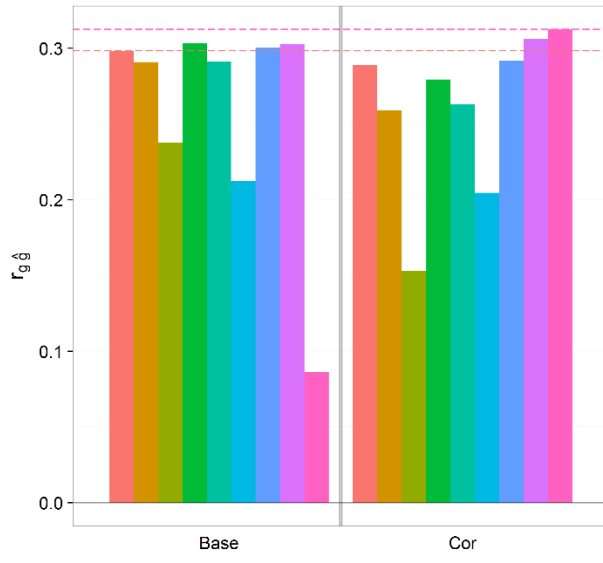

Liberty-C2: PH in WI

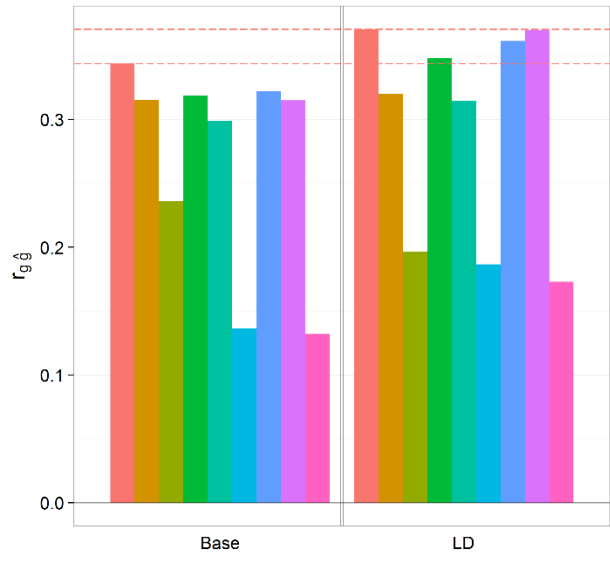

WS4U-C2: PH in NE

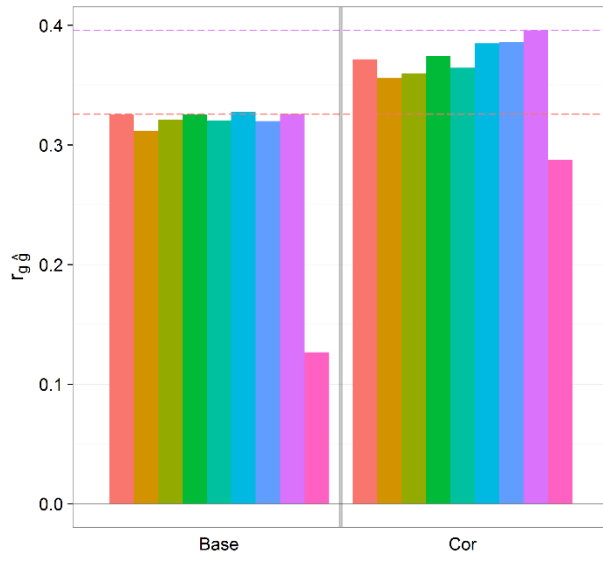

Liberty-C2: PH in NE

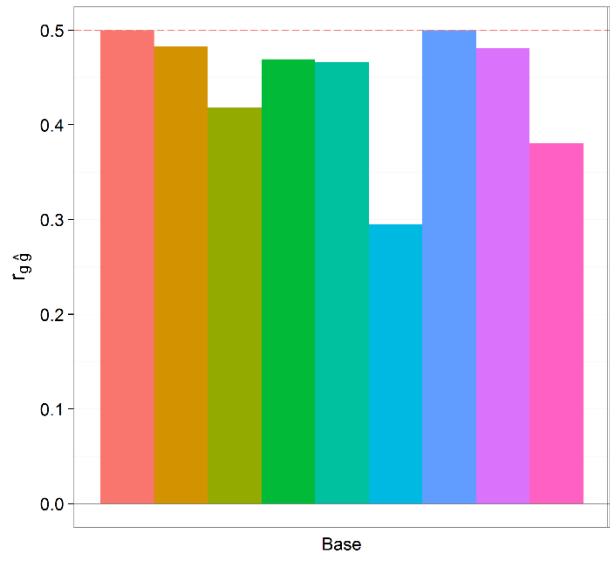

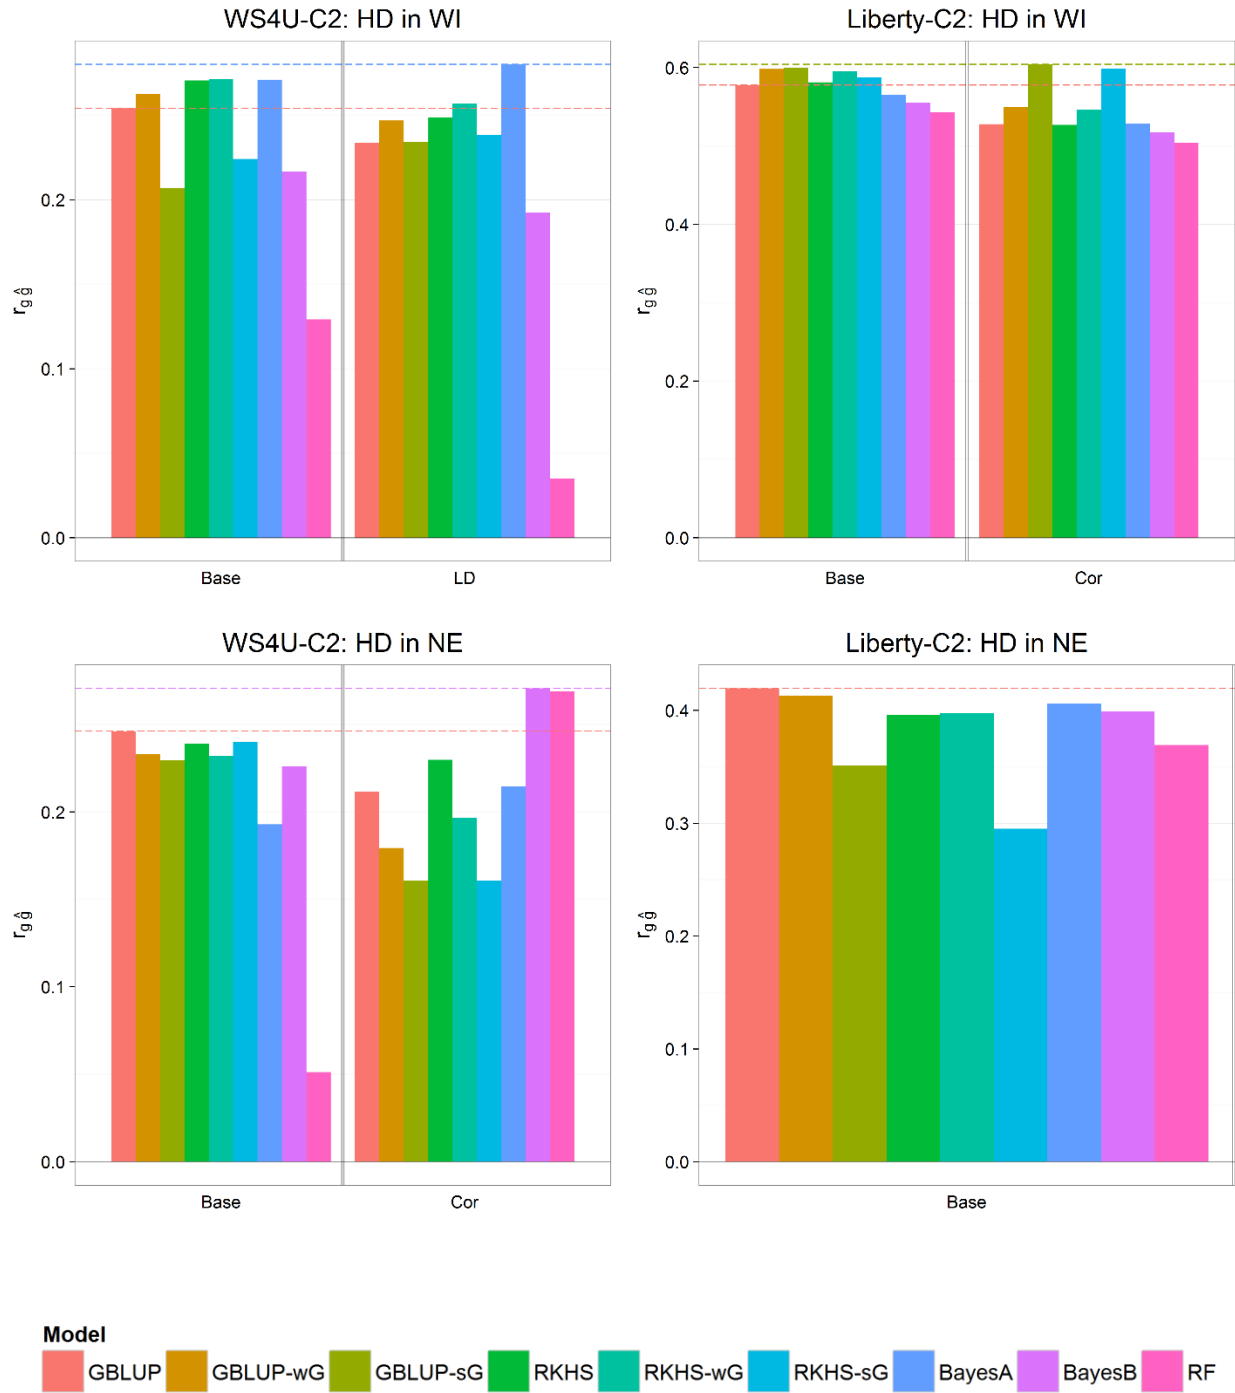

**Figure S4** – Bar plots of mean prediction accuracies from non-replicated five-fold cross-validation for all outcomes. The values showed correspond to those in Tables 3 and S3. For a given outcome, only the values for Base and the selected marker-data transformation are shown.
