# Supplementary material for: Accuracy of Genomic Prediction in Switchgrass (Panicum virgatum L.) Improved by Accounting for Linkage Disequilibrium
Source: PubMed Central journal article supplement (PMC4825640; doi:10.1534/g3.115.024950), 2016-02-10
Supplement: supp_g3.115.024950_FigureS5.pdf [file supp_g3.115.024950_FigureS5.pdf]

WS4U-C2: PH in WI

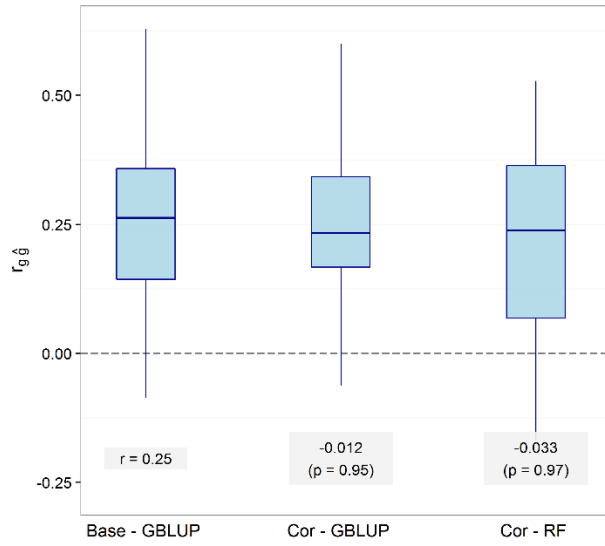

Liberty-C2: PH in WI

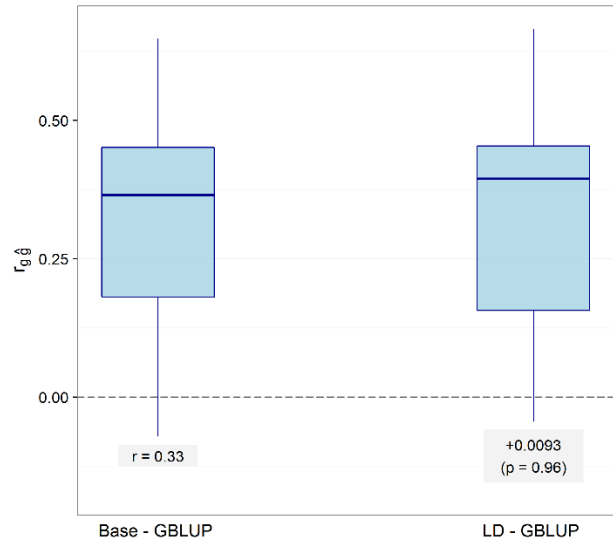

WS4U-C2: PH in NE

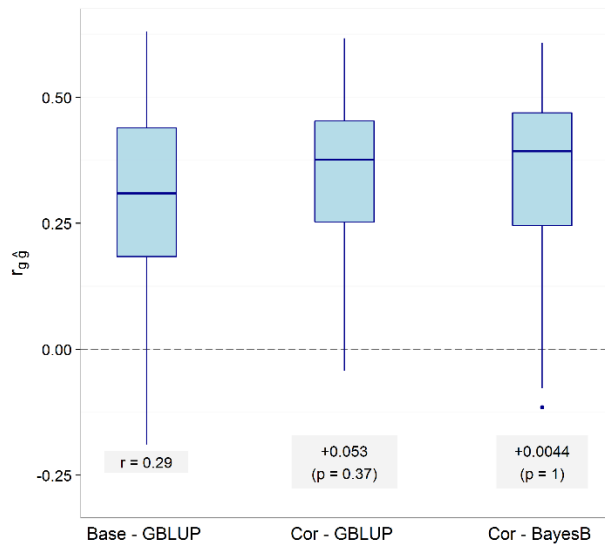

Liberty-C2: PH in NE

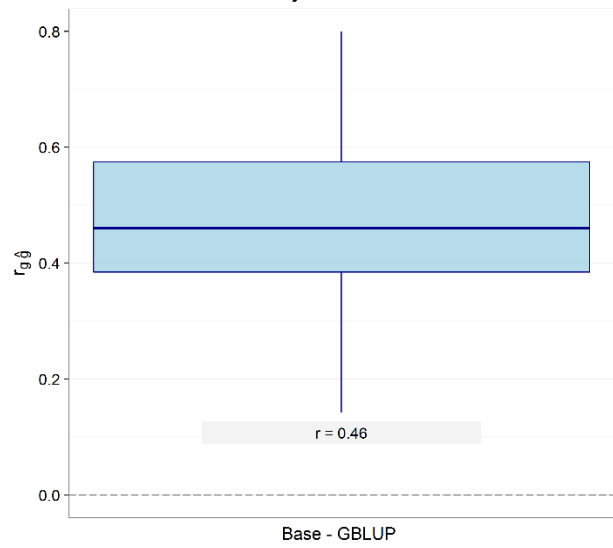

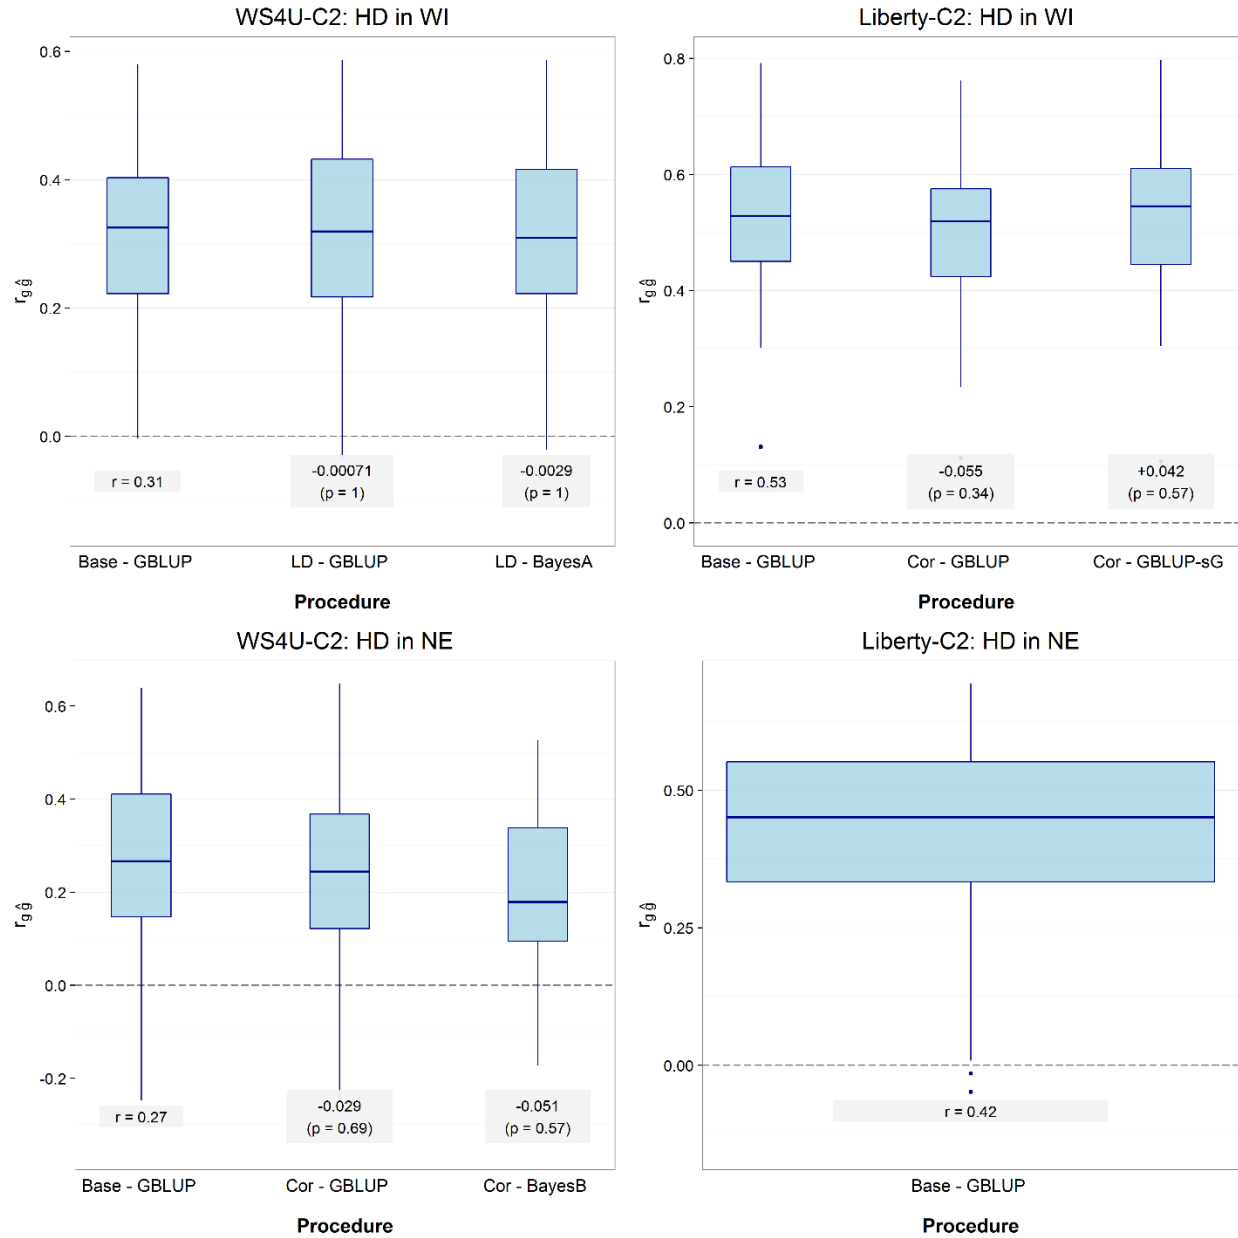

**Figure S5** – Validation of selected prediction procedures for PH and HD in WI and NE. Prediction accuracies ( $r_{gg}$ ) were estimated with a within-population/within-environment learning scheme in five-fold cross-validation, replicated ten times. In each boxplot, up to two comparisons are made: (i) the candidate-transformation procedure (selected marker-data transformation according to non-replicated five-fold cross-validation in a GBLUP model; Table S3) is compared to the standard procedure (Base – GBLUP) – if relevant; and (ii) the candidate procedure (selected prediction procedure according to non-replicated five-fold cross-validation; Table S3) is compared to the candidate-transformation procedure. The significance of differences in prediction accuracies was assessed by two-sided paired Dunnett tests, which accounted for multiple testing of data

*transformations, in (i), and of prediction models, in (ii). The t-statistics in Dunnett tests were adjusted to account for correlation among training sets in cross-validation, as described in Bouckaert and Frank (2004).*
