# Supplementary material for: Accuracy of Genomic Prediction in Switchgrass (Panicum virgatum L.) Improved by Accounting for Linkage Disequilibrium
Source: PubMed Central journal article supplement (PMC4825640; doi:10.1534/g3.115.024950), 2016-02-10
Supplement: supp_g3.115.024950_TableS2.pdf [file supp_g3.115.024950_TableS2.pdf]

**Table S2.** Mean prediction accuracy across population and environment learning schemes for PH and HD in WI and NE.

|                   |             | <b>PH in WI</b> |             | <b>PH in NE</b> |             |
|-------------------|-------------|-----------------|-------------|-----------------|-------------|
|                   |             | Within env.     | Across env. | Within env.     | Across env. |
| <b>WS4U-C2</b>    | Within pop. | 0.254           | 0.253       | 0.292           | 0.297       |
|                   | Across pop. | 0.235           | 0.247       | 0.289           | 0.297       |
| <b>Liberty-C2</b> | Within pop. | 0.329           | 0.364       | 0.460           | 0.458       |
|                   | Across pop. | 0.334           | 0.367       | 0.461           | 0.454       |
|                   |             | <b>HD in WI</b> |             | <b>HD in NE</b> |             |
|                   |             | Within env.     | Across env. | Within env.     | Across env. |
| <b>WS4U-C2</b>    | Within pop. | 0.312           | 0.314       | 0.268           | 0.285       |
|                   | Across pop. | 0.291           | 0.300       | 0.272           | 0.285       |
| <b>Liberty-C2</b> | Within pop. | 0.530           | 0.519       | 0.421           | 0.448       |
|                   | Across pop. | 0.506           | 0.478       | 0.410           | 0.431       |

Prediction accuracies were estimated with Base – GBLUP in five-fold cross-validation replicated ten times. The significance of differences in prediction accuracy was assessed by two-sided paired Dunnett tests, which accounted for multiple comparisons of learning schemes to a single reference (the within-population/within-environment scheme). The t-statistics in Dunnett tests were adjusted to account for correlation among training sets in cross-validation, as described in Bouckaert and Frank (2004). For a given population and trait-location combination, differences in prediction accuracy compared to the within- population/within-environment scheme were never deemed significant ( $p > 0.10$  in paired Dunnett tests).
